# Supplementary material for: Real-time terahertz imaging with a single-pixel detector
Source: PubMed Central journal article supplement (PMC7242476; doi:10.1038/s41467-020-16370-x), 2020-05-21
Supplement: 41467_2020_16370_MOESM3_ESM.pdf [file 41467_2020_16370_MOESM3_ESM.pdf]

## Description of Additional Supplementary Files

File name: Supplementary Movie 1

Description: Real-time display of a THz image. A thin metal bar is placed in a THz beam with a Gaussian profile, and the resulting image is displayed on the monitor on the right. Red colour means strong field amplitude and blue means weak field amplitude. The THz video-stream is 32x32 resolution with about 6 frames-per-second, which is enough to see the metal bar move in real-time with the THz beam. We use [1 0] Paley-Hadamard masks switched at a 3.125kHz rate with 40% sampling ratio.

File name: Supplementary Movie 2

Description: A hyperspectral THz image. This is 32x32 THz hyperspectral image shown as a movie with 10 frames-per-second. We use [1 0] Paley-Hadamard masks switched at a 4kHz rate with 40% sampling ratio for image acquisition at each temporal point. The imaged object consists of 4 materials: air, metal, 210 $\mu$ m and 420 $\mu$ m thick plastic, and the movie shows how the THz pulse arrives at different points in time depending on which material the THz has propagated through.
